# Supplementary material for: Preparation of mesostructured silica–micelle hybrids and their conversion to mesoporous silica modified controllably with immobilized hydrophobic blocks by using triethoxysilyl-terminated PEO–PPO–PEO triblock copolymer
Source: Royal Society of Chemistry journal article supplement (doi:10.1039/c0jm03540h), 2011-01-01

**Electronic Supplementary Information (Table S1, Fig. S1~S3)****Preparation of mesostructured silica-micelle hybrids and their conversion to mesoporous silica modified controllably with immobilized hydrophobic blocks by using triethoxysilyl-terminated PEO-PPO-PEO triblock copolymer****Chihiro Urata,<sup>a</sup> Yasuhiro Tamura,<sup>a</sup> Yusuke Yamauchi<sup>bc</sup> and Kazuyuki Kuroda<sup>\*ad</sup>**

<sup>10</sup> <sup>a</sup> Faculty of Science & Engineering, Waseda University, Ohkubo 3-4-1, Shinjuku, Tokyo 169-8555, Japan. Fax: +81-3-5286-3199; Tel: +81-3-5286-3199; E-mail: kuroda@waseda.jp (K.K.)

<sup>b</sup> World Premier International (WPI) Research Center, International Center for Materials Nanoarchitectonics (MANA), National Institute for Materials Science (NIMS), Namiki 1-1, Ibaraki 305-0047, Japan.

<sup>15</sup> <sup>c</sup> Precursory Research for Embryonic Science and Technology (PRESTO), Japan Science and Technology Agency (JST), Kawaguchi-shi, Saitama 332-0012, Japan.

<sup>d</sup> Kagami Memorial Laboratory for Material Science and Technology, Waseda University, Nishiwaseda 2-8-26, Tokyo 169-0051, Japan.

Table S1 Textural properties of SMHs.

<sup>a</sup> Specific surface area calculated by the BET method. <sup>b</sup> Pore size calculated by the NLDFT method. <sup>c</sup> Pore size calculated by the BJH method. <sup>d</sup> Total pore volume calculated at P/P<sub>0</sub> = ca. 0.95. <sup>e</sup> Micro pore volume evaluated using the *t*-plot method. <sup>f</sup> Weight percent of P123 derived species in the samples estimated from the TG-DTA data.

| sample   | x   | <i>d</i> -spacing<br>nm | $S_{\text{BET}}^a$<br>m <sup>2</sup> g <sup>-1</sup> | $D_{\text{NLDFT}}^b$<br>nm | $D_{\text{BJH}}^c$<br>nm | $V_{\text{total}}^d$<br>cm <sup>3</sup> g <sup>-1</sup> | $V_{\text{micro}}^e$<br>cm <sup>3</sup> g <sup>-1</sup> | Organics <sup>f</sup><br>wt % |
|----------|-----|-------------------------|------------------------------------------------------|----------------------------|--------------------------|---------------------------------------------------------|---------------------------------------------------------|-------------------------------|
| asSMH    | 100 | 9.4                     | -                                                    | -                          | -                        | -                                                       | -                                                       | 49                            |
|          | 75  | 9.5                     | -                                                    | -                          | -                        | -                                                       | -                                                       | 52                            |
|          | 50  | 9.4                     | -                                                    | -                          | -                        | -                                                       | -                                                       | 51                            |
|          | 25  | 9.4                     | -                                                    | -                          | -                        | -                                                       | -                                                       | 53                            |
|          | 0   | 9.6                     | -                                                    | -                          | -                        | -                                                       | -                                                       | 57                            |
| exSMH    | 100 | 10                      | 130                                                  | 7.3                        | 7.9                      | 0.29                                                    | 0                                                       | 48                            |
|          | 75  | 10                      | 160                                                  | 6.8                        | 6.7                      | 0.31                                                    | 0                                                       | 43                            |
|          | 50  | 9.4                     | 230                                                  | 6.5                        | 6.1                      | 0.39                                                    | 0                                                       | 37                            |
|          | 25  | 8.9                     | 290                                                  | 6.0                        | 5.3                      | 0.42                                                    | 0                                                       | 21                            |
|          | 0   | 8.7                     | 590                                                  | 5.4                        | 4.7                      | 0.57                                                    | 0.065                                                   | 7.9                           |
| ascalSMH | 100 | 7.7                     | 290                                                  | 5.2                        | 3.9                      | 0.30                                                    | 0.004                                                   | -                             |
|          | 75  | 7.8                     | 280                                                  | 4.9                        | 3.8                      | 0.31                                                    | 0.018                                                   | -                             |
|          | 50  | 7.9                     | 320                                                  | 5.2                        | 4.2                      | 0.37                                                    | 0.012                                                   | -                             |
|          | 25  | 7.8                     | 280                                                  | 5.2                        | 3.8                      | 0.31                                                    | 0.009                                                   | -                             |
|          | 0   | 7.7                     | 310                                                  | 5.2                        | 4.1                      | 0.40                                                    | 0.004                                                   | -                             |
| excalSMH | 100 | 10                      | 480                                                  | 6.7                        | 6.8                      | 0.63                                                    | 0                                                       | -                             |
|          | 75  | 8.9                     | 440                                                  | 6.5                        | 6.2                      | 0.51                                                    | 0.018                                                   | -                             |
|          | 50  | 8.7                     | 430                                                  | 6.0                        | 5.4                      | 0.52                                                    | 0.016                                                   | -                             |
|          | 25  | 8.2                     | 350                                                  | 5.3                        | 4.4                      | 0.39                                                    | 0.028                                                   | -                             |
|          | 0   | 7.9                     | 320                                                  | 5.0                        | 4.1                      | 0.37                                                    | 0.015                                                   | -                             |

Fig. S1 TEM images of the (a) asSMH\_100, (b) exSMH\_100, (c) ascalSMH\_100, (d) exscalSMH\_100 (Scale bar : 200 nm)

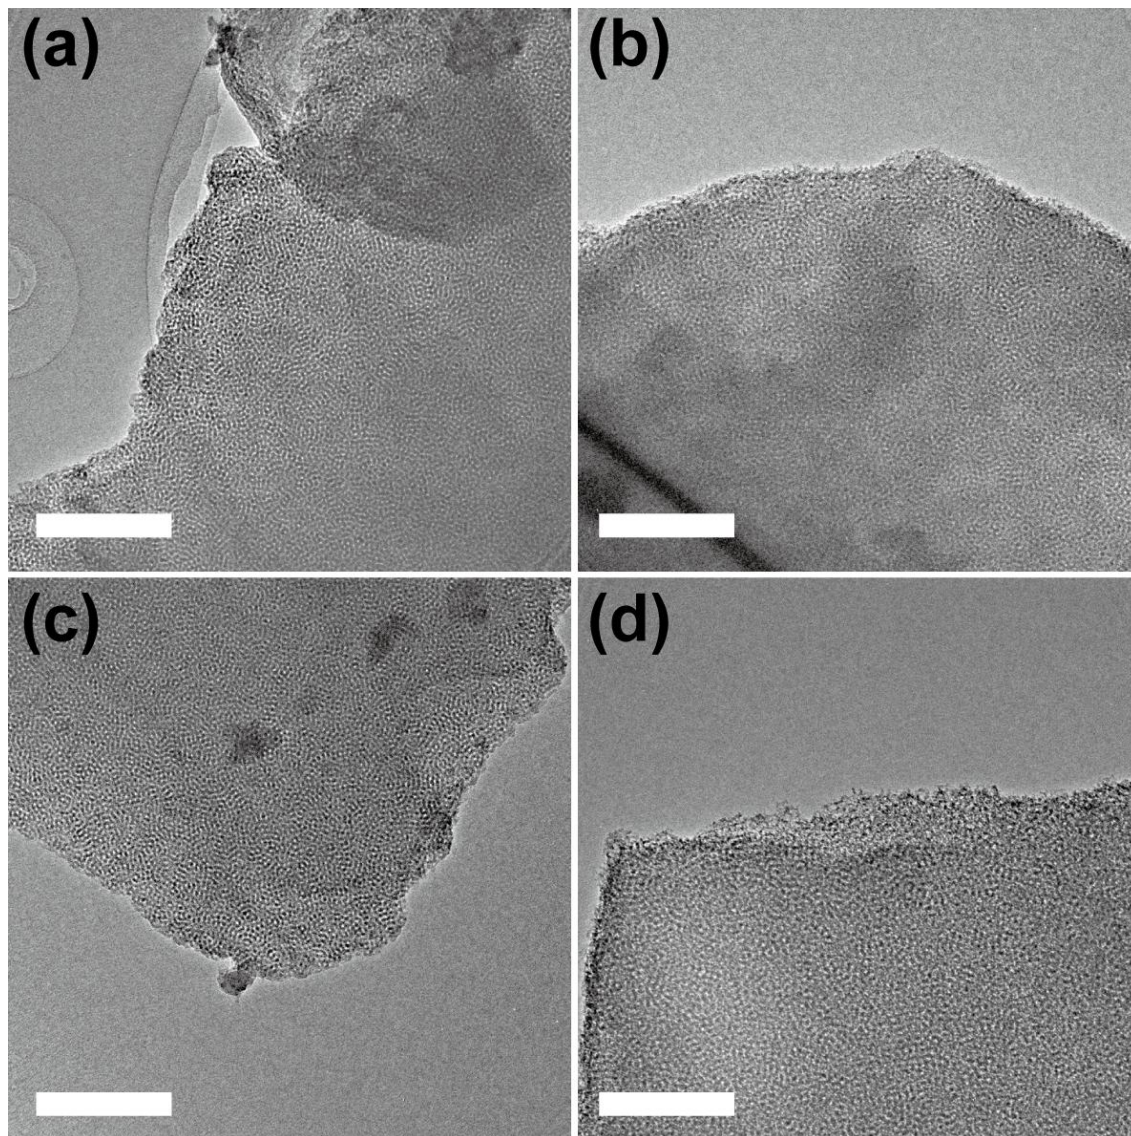

Fig. S2 Illustration of several asSMHs obtained by spray drying, spin coating, and anodic alumina membrane templating methods.

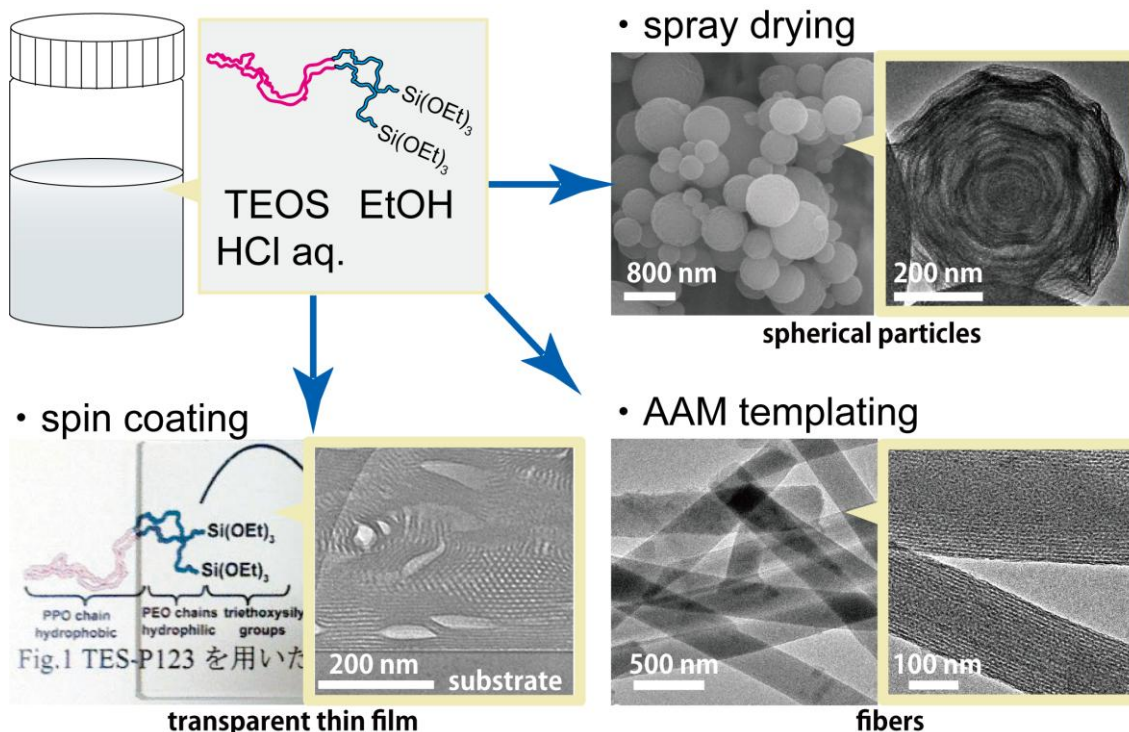

5

### Experimental conditions

**Spray drying:** The spray dry apparatus used in this study is a laboratory-made one altered from a Spray Dryer GA32 (Yamato Scientific Co.). Droplets of a precursor solution for SMH\_100 were generated from a two-flow spray nozzle (the diameters of the spray drying nozzles are 406 and 1270  $\mu\text{m}$ ). The droplets were carried by an air flow (250  $^{\circ}\text{C}$ ) and dried in a heating zone. Finally, powdery samples were collected by a cyclone separator.

**Spin coating:** A precursor solution for SMH\_100 was spin-coated on glass substrates at 2000 rpm for 10 seconds and air-dried at room temperature for 2 days.

**Anodic alumina membrane (AAM) templating:** A precursor solution for SMH\_100 was dropped on AAM (Whatman, Anodisc 25, pore diameter ca. 200 nm, thickness 60  $\mu\text{m}$ ) and infiltrated into the AAM channels and air-dried at room temperature for 2 days. The AAM was dissolved by 5 wt %  $\text{H}_3\text{PO}_4$ .



Fig. S3 SAXD patterns and TEM images (inset) of asSMH\_0-IBU and asSMH\_100-IBU

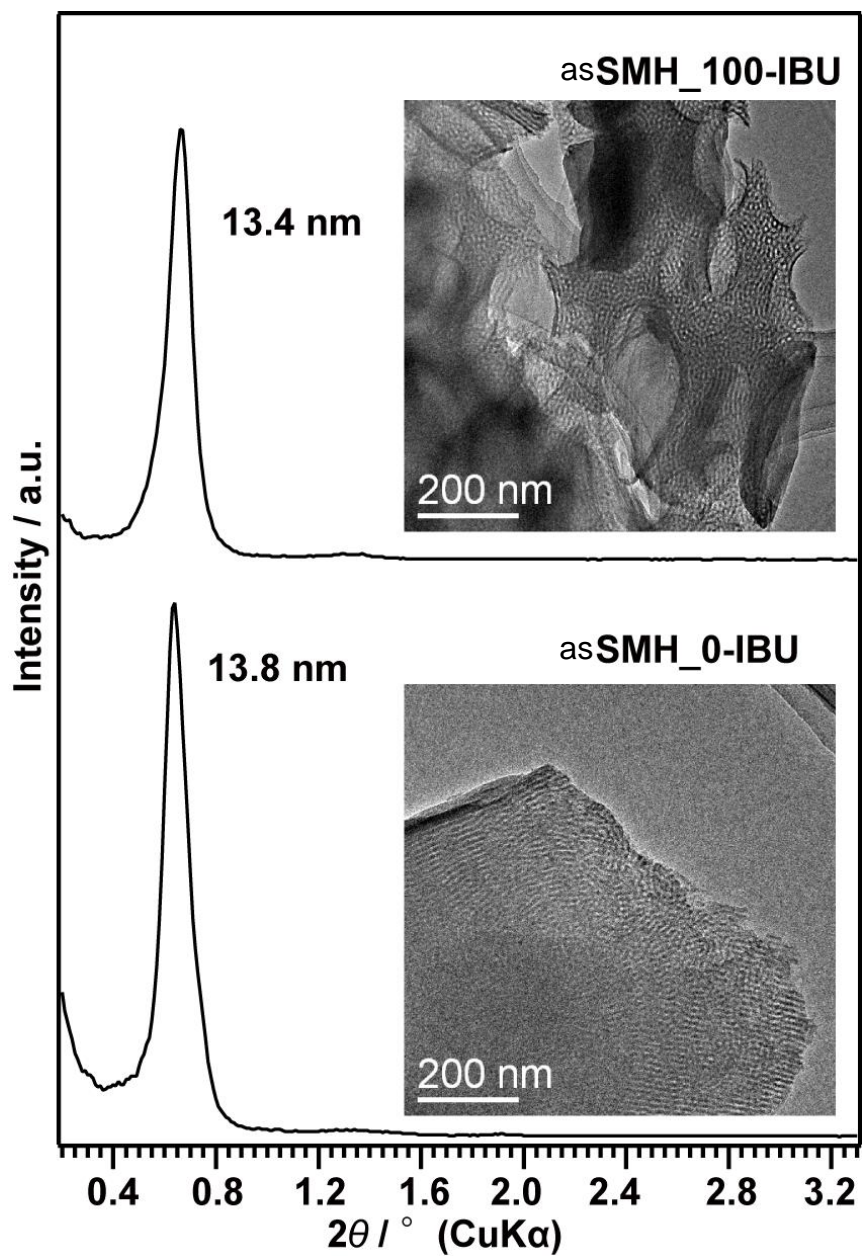

Supplement: c0jm03540h.pdf [file c0jm03540h.pdf]
